# Supplementary material
Source: PubMed Central journal article supplement (PMC6387567)
Supplement: Supp_Fig1.pdf [file Supp_Fig1.pdf]

## Supplementary Data

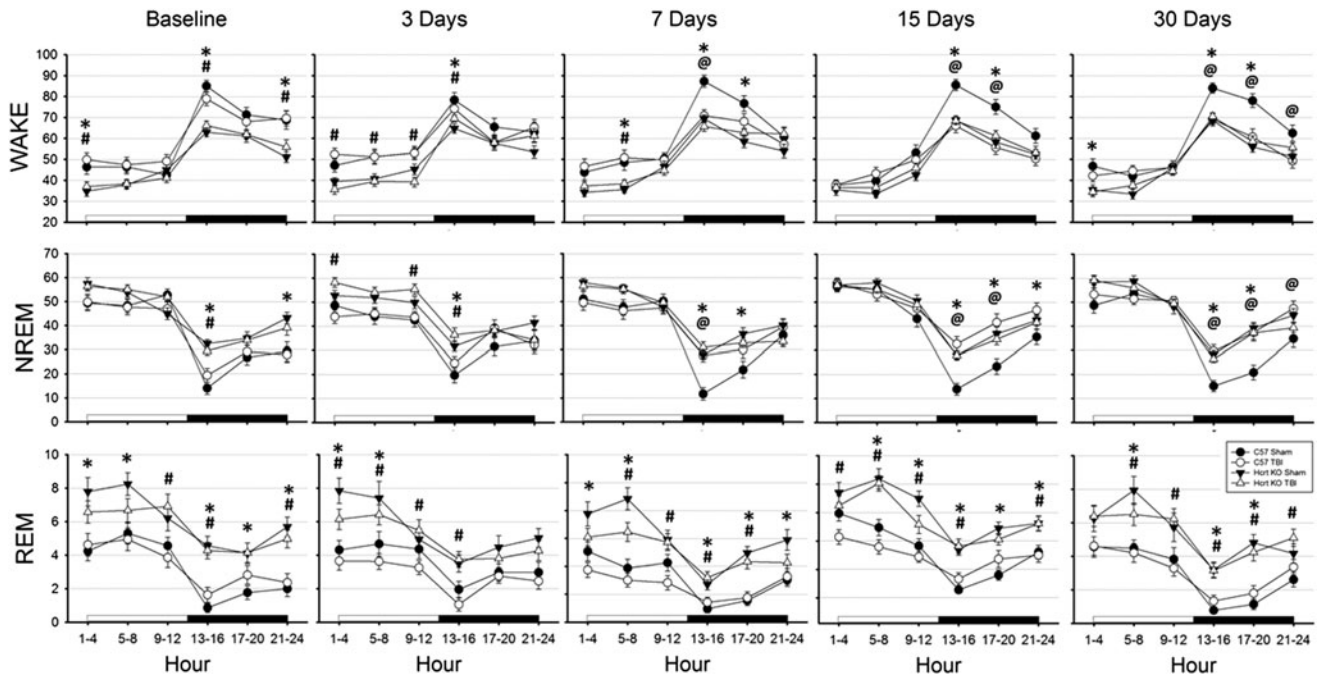

**SUPPLEMENTARY FIG. S1.** Temporal patterns of sleep and wake are altered by traumatic brain injury (TBI) in a genotype-dependent manner. The temporal distribution of sleep–wake behavior is presented in 4-h time blocks for visual clarity. Values are mean ( $\pm$  standard error of the mean) percent recording time spent in wakefulness (WAKE), non-rapid eye movement (NREM) sleep, or rapid eye movement (REM) for C57BL/6J mice subjected to sham surgery ( $n=8$ ); C57BL/6J mice subjected to TBI ( $n=9$ ), hypocretin knockout (HCRT KO) mice that received sham surgery ( $n=8$ ), and HCRT KO mice in which TBI was induced ( $n=8$ ). Baseline recordings were obtained from undisturbed animals prior to surgeries. Hours 1–12 are the light period (open bars on the x-axis) and Hours 13–24 are the dark period (filled bars on x-axis). \* indicates a statistical difference ( $p < 0.05$ ) between C57BL/6J and HCRT KO mice within the sham condition, and # indicates a statistical difference between C57BL/6J and HCRT KO mice within the TBI condition. Statistical differences ( $p < 0.05$ ) between conditions (sham vs. TBI) in C57BL/6J mice are indicated by @. There were no statistically significant differences between conditions within the HCRT KO genotype at any time-point evaluated.
